RESEARCH ARTICLE

# Population Genetics and Antimicrobial Susceptibility of Canine *Campylobacter* Isolates Collected before and after a Raw Feeding Experiment

Satu Olkkola<sup>1</sup>\*, Sara Kovanen<sup>1</sup>, Johanna Roine<sup>2</sup>, Marja-Liisa Hänninen<sup>1</sup>, Anna Hielm-Björkman<sup>2</sup>, Rauni Kivistö<sup>1</sup>

**1** Department of Food Hygiene and Environmental Health, Faculty of Veterinary Medicine, University of Helsinki, Helsinki, Finland, **2** Department of Equine and Small Animal Medicine, Faculty of Veterinary Medicine, University of Helsinki, Helsinki, Finland

\* These authors contributed equally to this work.

\* [satu.olkkola@helsinki.fi](mailto:satu.olkkola@helsinki.fi)

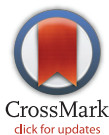

## OPEN ACCESS

**Citation:** Olkkola S, Kovanen S, Roine J, Hänninen M-L, Hielm-Björkman A, Kivistö R (2015) Population Genetics and Antimicrobial Susceptibility of Canine *Campylobacter* Isolates Collected before and after a Raw Feeding Experiment. PLoS ONE 10(7): e0132660. doi:10.1371/journal.pone.0132660

**Editor:** Yung-Fu Chang, Cornell University, UNITED STATES

**Received:** April 17, 2015

**Accepted:** June 17, 2015

**Published:** July 14, 2015

**Copyright:** © 2015 Olkkola et al. This is an open access article distributed under the terms of the [Creative Commons Attribution License](http://creativecommons.org/licenses/by/4.0/), which permits unrestricted use, distribution, and reproduction in any medium, provided the original author and source are credited.

**Data Availability Statement:** The allele sequences of the new *C. upsaliensis* MLST types described in this study are deposited and freely available in the pubMLST non-jejuni/coli database. The whole genome sequences of *C. jejuni*/*C. upsaliensis* are publicly available on the RAST server (<http://rast.nmpdr.org>) with guest account under IDs 197.896 and 197.897 (*C. jejuni*) and 28080.19-24, 28080.26-28, 28080.30-41 and 28080.44-46 (*C. upsaliensis*).

**Funding:** SO received funding from the Finnish Foundation of Veterinary Research (no specific grant number) for conducting this study. The funder had no

## Abstract

In recent years, increasing numbers of consumers have become interested in feeding raw food for their pet dogs as opposed to commercial dry food, in the belief of health advantages. However, raw meat and internal organs, possibly contaminated by pathogens such as *Campylobacter* spp., may pose a risk of transmission of zoonoses to the pet owners. *Campylobacter jejuni* is the leading cause of bacterial gastroenteritis in humans but *C. upsaliensis* has also been associated with human disease. In this study we investigated the effect of different feeding strategies on the prevalence of *Campylobacter* spp. in Finnish dogs. We further characterized the isolates using multilocus sequence typing (MLST), whole-genome (wg) MLST and antimicrobial susceptibility testing. Dogs were sampled before and after a feeding period consisting of commercial raw feed or dry pellet feed. Altogether 56% (20/36) of the dogs yielded at least one *Campylobacter*-positive fecal sample. *C. upsaliensis* was the major species detected from 39% of the dogs before and 30% after the feeding period. Two *C. jejuni* isolates were recovered, both from raw-fed dogs after the dietary regimen. The isolates represented the same genotype (ST-1326), suggesting a common infection source. However, no statistically significant correlation was found between the feeding strategies and *Campylobacter* spp. carriage. The global genealogy of MLST types of dog and human *C. upsaliensis* isolates revealed weakly clonal population structure as most STs were widely dispersed. Major antimicrobial resistance among *C. upsaliensis* isolates was against streptomycin (STR MIC > 4mg/l). Apart from that, all isolates were highly susceptible against the antimicrobials tested. Mutations were found in the genes *rpsL* or *rpsL* and *rsmG* in streptomycin resistant isolates. In conclusion, increasing trend to feed dogs with raw meat warrants more studies to evaluate the risk associated with raw feeding of pets in transmission of zoonoses to humans.

role in study design, data collection and analysis, decision to publish, or preparation of the manuscript.

**Competing Interests:** The authors have declared that no competing interests exist.

## Introduction

Campylobacteriosis is the most common bacterial gastrointestinal disease in humans worldwide. The major species causing human disease are *Campylobacter jejuni* and *Campylobacter coli*. However, *Campylobacter upsaliensis*, often isolated from dogs [1–3] has been described as a cause of human disease including gastroenteritis and bacteremia [4–6] and dog ownership or contact with dogs has been identified as a risk factor for human campylobacter infections [7,8]. In dogs, asymptomatic carriage is common and especially *C. upsaliensis* is frequently isolated from both symptomatic and asymptomatic dogs [9,10]. However, it has been suggested that *C. jejuni*, and especially certain genotypes (i.e. ST-45), are significantly more prevalent among diarrheic than non-diarrheic dogs [11]. Furthermore, Chaban et al. (2010) showed that diarrheic dogs were more likely to shed *Campylobacter* spp., *C. jejuni* and *C. coli* among others, at significantly higher concentrations compared to healthy dogs [12].

In a previous study, genotyping by randomly amplified polymorphic DNA typing could not distinguish between two human clinical *C. jejuni* isolates and four canine strains suggesting that dogs are significant reservoirs of *Campylobacter* and contribute to human enteric infections [13]. Multilocus sequence typing (MLST) has been a valuable method in studies of molecular epidemiology, population structure and source attribution of *Campylobacter* [14–16]. However, little data on the genetic diversity of *C. jejuni* [8,11,17] and especially *C. upsaliensis* isolates in dogs worldwide exist [18].

In recent years, a growing number of consumers have become interested in offering raw meat-based feed for their dogs, considered as more natural and healthy as opposed to commercial dry food (<http://www.barfaustralia.com>). Raw dog food typically includes uncooked meat, edible bones and internal organs, such as liver, from various animals, for example chickens, bovines and pigs. In addition, Biologically Appropriate Raw Food or Bones and Raw Food (BARF) typically contains at least fruit and vegetables, and also possibly eggs and dairy products [19].

Campylobacters are commonly isolated from raw chicken meat [20] and also from bovine, pig and chicken livers [21–23]. In a recent Canadian study, DNA-based methods further revealed the presence of various *Campylobacter* spp. in ground beef, used also as dog raw food, including *C. jejuni* (3.9%) and *C. upsaliensis* (2.9%) [24]. However, in two previous studies, no *Campylobacter* spp. were found when evaluating the bacteriological quality of commercial raw canine diets [25] or raw meat diets [26]. Further, the only study concerning canine raw feeding found one of the 42 (2.6%) raw meat-fed dogs and none of the 49 control dogs to be positive for *C. jejuni* [27].

Campylobacteriosis in humans is usually self-limiting but severe cases or immunocompromised patients are treated with antimicrobials, preferentially with macrolides or fluoroquinolones [28]. Intravenous aminoglycosides can also be used in serious campylobacter bacteremia [29]. Antimicrobial resistance of *C. jejuni* from dogs (and cats) has been evaluated in some studies with resistance rates varying between 0–60% for quinolones, 0–40% for tetracycline and 0–12% for erythromycin with lowest prevalence of resistant isolates found in Norway [10,11,30,31]. However, only a limited number of studies on the prevalence or mechanisms of antimicrobial resistance of canine *C. upsaliensis* strains exist [10,31,32]. Interestingly, in a Norwegian study, most canine *C. upsaliensis* isolates were resistant to streptomycin and one strain was also resistant to nalidixic acid [31] and all outbreak-associated *C. upsaliensis* isolates from children in day care centers in Brussels were also resistant to streptomycin [5]. Another study found that *C. upsaliensis* strain RM3195 isolated from a human patient was resistant to nalidixic acid, oxytetracycline and novobiocin but not to streptomycin or most of the  $\beta$ -lactam antibiotics. However, the authors found no known mutations, which could explain the quinolone resistance [33].

In this study our aims were i) to investigate the prevalence of *Campylobacter* spp. in dogs with reference to the feeding strategy before and after the feeding regimen, consisting of either raw or dry commercial dog food, (ii) to analyse the MLST and wgMLST (whole-genome MLST) types of *Campylobacter* spp. isolates in local and global view and (iii) to study the antimicrobial resistance patterns and mechanisms of the canine *Campylobacter* isolates.

## Materials and Methods

### Sample collection

Altogether, 36 Staffordshire bull terriers originating from a total of 30 households in Southern Finland, either healthy or diagnosed with atopic dermatitis, were included in this study. The dogs were divided in two groups with 15 dogs receiving commercial dry pellet feed and 18 dogs receiving raw feed consisting of meat, bones and organs from pork, chicken and lamb and/or beef, turkey and salmon. The feeding period lasted for 4 to 5 months. Owners of three dogs did not keep to the feeding regimen and those dogs were excluded from the *Campylobacter* prevalence analysis. Fecal samples were collected twice, before and after the feeding period, by the owners as a three-day pooled sample and kept refrigerated prior to analysis performed within 0 to 3 days from collection. All animal work has been conducted according to relevant national and international guidelines and with the dog owners' consent. This study was authorized by a written permission from the National Animal Experiment Board (Eläinkoelautakunta ELLA, decision number ESAVI/3244/04.10.07/2013) under Regional State Administrative Agency for Southern Finland.

### Bacterial isolates

Fecal samples were suspended in 0.9% saline (1g feces/1ml saline) and a 10 µl loopful of this suspension was plated on modified charcoal cefoperazone deoxycholate agar (mCCDA) (CM739, Oxoid Ltd., Basingstoke, Hampshire, UK) with the selective supplement (SR155, Oxoid Ltd.) and incubated for up to 7 days at 37°C in jars (MART, anoxomat, Netherlands) in microaerobic conditions (6% O<sub>2</sub>, 10% CO<sub>2</sub>, 5% H<sub>2</sub>). At first, samples were also enriched in Bolton broth (Oxoid), with 5% horse blood and selective supplement (SR183E, Oxoid Ltd.), and incubated microaerobically at 37°C for 48 h but since all enriched samples, unlike direct culture, were consistently negative for *Campylobacter* spp. we ceased using this method. Colonies showing typical growth on mCCDA and morphology in gram stain were confirmed as *Campylobacter* spp. using genus specific PCR [34] and as *C. jejuni* or *C. upsaliensis* with species specific PCR [34,35]. Bacterial isolates were identified at baseline with the individual dog numbers (DRXX) and after the feeding period with number two at the end (DRXX\_2).

### Whole genome sequencing, MLST and data analysis

Draft genome sequences of all the recovered *C. jejuni* and *C. upsaliensis* isolates were determined using Illumina MiSeq or HiSeq technology (Nextera library, Nextera XT paired end kit, 250 cycles). NGS library preparation, enrichment and sequencing were performed by the Institute for Molecular Medicine Finland (FIMM Technology Centre, University of Helsinki, Finland). The paired-end reads were assembled into contigs using SPAdes 3.1.1 [36]. MLST types were assigned using the *Campylobacter* MLST database (pubMLST.org/campylobacter/) and new allele sequences were submitted to the non *jejuni/coli* *Campylobacter* MLST database (<http://pubmlst.org/campylobacter/>).

The draft genomes were further analysed for whole-genome MLST using Genome profiler (GeP) [37]. The genomes were annotated in RAST (Rapid annotation using subsystem

technology) and the resulting gbk files were used, as suitable, as reference genomes in the GeP analysis [37]. The NeighborNet networks, representing allelic distance matrix of the shared loci of the isolates, were constructed using SplitsTree4 [38] and edited using CorelDRAW X6.

The software ClonalFrame ver. 1.2 [39] was used to generate a genealogy tree of all known *C. upsaliensis* STs from the MLST database (<http://pubmlst.org/campylobacter/>) based on the sequences of the seven housekeeping genes with 50 000 iterations, 50 000 burn-in iterations and every 100<sup>th</sup> three was sampled.

A full minimum spanning tree of all MLST profiles present in the PubMLST database and isolate data (origins, i.e. country and source combinations with more than 2 isolates were included) from this study as well as those present in the PubMLST database and published by Parsons et al. (2012) was generated using the goeBURST algorithm [40,41] and visualized using PHYLOViZ 1.1 [42].

The nucleotide sequences of the *C. upsaliensis* genes *gyrA*, *rsmG*, *rpsL* and *rrs* were searched by BLAST in RAST, translated using EMBOSS Transeq ([http://www.ebi.ac.uk/Tools/st/emboss\\_transeq/](http://www.ebi.ac.uk/Tools/st/emboss_transeq/)) and aligned for comparison using MUSCLE (<http://www.ebi.ac.uk/Tools/msa/muscle/>). The sequences were compared to those of *C. upsaliensis* RM3195.

## MIC determination

All the recovered *C. jejuni* (n = 2) and *C. upsaliensis* (n = 24) isolates were screened for antimicrobial resistance for erythromycin (ERY), tetracycline (TET), streptomycin (STR), gentamicin (GEN) and for the quinolones ciprofloxacin (CIP) and nalidixic acid (NAL) with the broth microdilution method (VetMIC Camp, National Veterinary Institute, Uppsala, Sweden) according to the manufacturer's instructions. However, due to the fastidious nature of some of the *C. upsaliensis* isolates, a modified method utilizing Nutrient broth (Oxoid Ltd., Basingstoke, Hampshire, UK) with 5% blood (Labema, Kerava, Finland) instead of cation-adjusted Muller-Hinton broth (Difco, Becton-Dickinson and Company, Sparks, USA) with 5% blood was used for part of the *C. upsaliensis* isolates [43]. The agar dilution method (Clinical and Laboratory Standards Institute M31-A3) was used to determine and confirm the STR resistance levels of *C. upsaliensis* isolates. The epidemiological cut-off values (ECOFFs) for *C. jejuni*, as determined by the European Committee on Antimicrobial Susceptibility Testing (EUCAST, [www.eucast.org](http://www.eucast.org)), were applied to distinguish between wild type (also referred to as susceptible) and non-wild type (also referred to as resistant) populations and were as follows: MIC > 4 mg/l for ERY and STR, MIC > 0.5 mg/l for CIP, MIC > 1 mg/l for TET, MIC > 2 mg/l for GEN and MIC > 16 mg/l for NAL. Due to the lack of data concerning MIC distributions of *C. upsaliensis*, these ECOFFs were also applied for it.

## Results

### Occurrence and MLST types of *Campylobacter* spp. before and after raw feeding

The main results are presented in Table 1. A total of two *C. jejuni* and 24 *C. upsaliensis* isolates were detected from the feces of the 36 dogs included in this study. Altogether 20 dogs (55.6%) were positive for *Campylobacter* spp. in at least one sampling and six (16.7%) were positive in both samplings. Of the 33 dogs that kept to the feeding regimen, at baseline 13 (39.4%) were positive for *C. upsaliensis* and after the feeding period two dogs (6.1%) carried *C. jejuni* and 10 dogs (30.3%) *C. upsaliensis*. The *C. jejuni* isolates were recovered from two raw-fed dogs from different households living approximately 10 kilometers apart in the Helsinki area. Both dogs were *Campylobacter*-negative at the beginning (Table 1). Four new *C. upsaliensis*-positive dogs

**Table 1. Feeding strategies and *Campylobacter* status of studied dogs at baseline sampling and after the feeding regimen.**

| Dog <sup>1</sup>   | Age (y) | Baseline sampling           |        |                         | Feeding strategy <sup>2</sup> | Sampling after the feeding regimen |         |                         |
|--------------------|---------|-----------------------------|--------|-------------------------|-------------------------------|------------------------------------|---------|-------------------------|
|                    |         | <i>Campylobacter</i> status | ST     | Resistance <sup>3</sup> |                               | <i>Campylobacter</i> status        | ST      | Resistance <sup>3</sup> |
| DR2S               | 6       | neg.                        | -      | -                       | D                             | neg.                               | -       | -                       |
| DR8S               | 6       | neg.                        | -      | -                       | D                             | neg.                               | -       | -                       |
| DR9S               | 9       | <i>C. upsaliensis</i>       | ST-158 | <b>STR</b>              | R                             | <i>C. upsaliensis</i>              | ST-159  | STR                     |
| DR10S <sup>a</sup> | 5       | neg.                        | -      | -                       | R                             | <i>C. jejuni</i>                   | ST-1326 | S                       |
| DR11S <sup>a</sup> | 7       | neg.                        | -      | -                       | R                             | neg.                               | -       | -                       |
| DR15S <sup>b</sup> | 6       | <i>C. upsaliensis</i>       | ST-160 | STR                     | R                             | <i>C. upsaliensis</i>              | ST-160  | STR                     |
| DR18S <sup>b</sup> | 4       | <i>C. upsaliensis</i>       | ST-160 | STR                     | R                             | <i>C. upsaliensis</i>              | ST-160  | STR                     |
| DR22S              | 6       | <i>C. upsaliensis</i>       | ST-165 | CIP-NAL- <b>STR</b>     | R                             | neg.                               | -       | -                       |
| DR24S              | 3       | neg.                        | -      | -                       | D                             | neg.                               | -       | -                       |
| DR25S              | 12      | neg.                        | -      | -                       | V                             | neg.                               | -       | -                       |
| DR26S              | 3       | neg.                        | -      | -                       | R                             | neg.                               | -       | -                       |
| DR27S              | 10      | neg.                        | -      | -                       | D                             | neg.                               | -       | -                       |
| DR28S              | 1       | <i>C. upsaliensis</i>       | ST-166 | S                       | R                             | neg.                               | -       | -                       |
| DR31S              | 3       | neg.                        | -      | -                       | D                             | neg.                               | -       | -                       |
| DR35S              | 5       | neg.                        | -      | -                       | R                             | neg.                               | -       | -                       |
| DR36S              | 10      | neg.                        | -      | -                       | R                             | <i>C. upsaliensis</i>              | ST-167  | <b>STR</b>              |
| DR37S              | 5       | neg.                        | -      | -                       | D                             | neg.                               | -       | -                       |
| DR39S              | 3       | <i>C. upsaliensis</i>       | ST-169 | S                       | D                             | neg.                               | -       | -                       |
| DR40S              | 1       | neg.                        | -      | -                       | D                             | <i>C. upsaliensis</i>              | ST-170  | <b>STR</b>              |
| DR41S              | 3       | neg.                        | -      | -                       | R                             | <i>C. jejuni</i>                   | ST-1326 | S                       |
| DR42S              | 1       | <i>C. upsaliensis</i>       | ST-171 | STR                     | R                             | neg.                               | -       | -                       |
| DR43S              | 2       | neg.                        | -      | -                       | V                             | neg.                               | -       | -                       |
| DR44S              | 3       | <i>C. upsaliensis</i>       | ST-172 | STR                     | D                             | <i>C. upsaliensis</i>              | ST-172  | STR                     |
| DR45S              | 6       | neg.                        | -      | -                       | V                             | <i>C. upsaliensis</i>              | ST-174  | STR                     |
| DR46S <sup>c</sup> | 7       | neg.                        | -      | -                       | D                             | neg.                               | -       | -                       |
| DR47S <sup>c</sup> | 7       | <i>C. upsaliensis</i>       | ST-166 | S                       | D                             | neg.                               | -       | -                       |
| DR48S              | 3       | <i>C. upsaliensis</i>       | ST-176 | STR                     | R                             | neg.                               | -       | -                       |
| DR49S              | 4       | neg.                        | -      | -                       | D                             | neg.                               | -       | -                       |
| DR50S              | 5       | neg.                        | -      | -                       | R                             | neg.                               | -       | -                       |
| DR51S              | 9       | neg.                        | -      | -                       | R                             | neg.                               | -       | -                       |
| DR52S <sup>d</sup> | 4       | neg.                        | -      | -                       | R                             | neg.                               | -       | -                       |
| DR53S <sup>d</sup> | 1       | neg.                        | -      | -                       | R                             | <i>C. upsaliensis</i>              | ST-177  | S                       |
| DR55S <sup>e</sup> | 5       | <i>C. upsaliensis</i>       | ST-178 | STR                     | D                             | <i>C. upsaliensis</i>              | ST-178  | STR                     |
| DR56S              | 3       | <i>C. upsaliensis</i>       | ST-167 | <b>STR</b>              | R                             | neg.                               | -       | -                       |
| DR59S <sup>e</sup> | 6       | <i>C. upsaliensis</i>       | ST-181 | S                       | D                             | <i>C. upsaliensis</i>              | ST-182  | <b>STR</b>              |
| DR60S <sup>e</sup> | 4       | neg.                        | -      | -                       | D                             | <i>C. upsaliensis</i>              | ST-182  | <b>STR</b>              |

<sup>1</sup> Dogs coming from the same household are indicated with the same superscript letter a-e.

<sup>2</sup> R, raw; D, dry; V, varied (did not follow the feeding regimen).

<sup>3</sup> S, susceptible; CIP, ciprofloxacin; NAL, nalidixic acid; STR, streptomycin (bolded when STR MIC > 512 mg/l).

doi:10.1371/journal.pone.0132660.t001

appeared after the feeding regimen; however, seven positive dogs at baseline seemed to have cleared off their *C. upsaliensis* carriage. No statistically significant association was found between raw or dry pellet feed diet and prevalence of *C. jejuni* or *C. upsaliensis*.

Both *C. jejuni* isolates represented sequence type (ST) 1326 and the 24 *C. upsaliensis* isolates were assigned to 16 STs, all of which were novel i.e. not existing in the PubMLST database

(Table 1). Four of the six dogs that were *C. upsaliensis*-positive in both samplings yielded the same ST both times. The remaining two dogs had *C. upsaliensis* isolates with completely different allelic profiles (DR9S, ST-158 and ST-159, Table 1) or shared sequences in only two MLST loci (DR59S, ST-181 and ST-182, Table 1) in the successive samplings.

### Whole-genome multilocus sequence typing (wgMLST)

All available draft genomes representing *C. jejuni* ST-1326 from the PubMLST database (pubMLST.org/campylobacter) and from our own collection were included in the wgMLST analysis, in addition to the canine ST-1326 isolates identified in the present study (Fig 1). Among the 1,457 shared genes between all the genomes, the least number of allelic differences (2) was seen between two Finnish chicken isolates (3719\_04 and 3723\_04, Fig 1), detected on the same day from different slaughter batches reared at the same farm. However, our dog isolates were more similar to each other with 53 allelic differences (DR10S\_2 and DR41S\_2, Fig 1), and to the two UK isolates with allelic differences ranging from 44 (DR41S\_2 and OXC4736, human stool isolate) to 111 (DR10S\_2 versus Dg283, isolate from an undefined animal) than to the Finnish chicken isolates.

The NeighborNet network of the wgMLST analysis of the Finnish canine *C. upsaliensis* isolates is shown in Fig 2. Altogether 664 genes were shared between the genomes. Lowest numbers of allelic differences at the wgMLST level were seen among the isolates from the same individual dogs representing the same STs, collected before and after the feeding period, ranging from 1 (DR44S, Fig 2) to 18 (DR15S, Fig 2). Furthermore, isolates collected from two different dogs living in the same household clustered closely together showing only 10 to 23 (DR15S and DR18S, Fig 2) and 21 (DR59S\_2 and DR60S\_2, Fig 2) allelic differences among the 664 shared genes. In addition, six isolates from the same number of dogs, originating from different households, formed two clusters, however, showing relatively high numbers of allelic differences ranging from 49 (DR36S\_2 versus DR42S, Fig 2) to 120 (DR28S versus DR47S, Fig 2), while rest of the isolates showed much higher genetic diversity.

### Global genealogy of *C. upsaliensis* isolates from different sources

Similar clusters that occurred among our isolates in the wgMLST NeighborNet network were also detected in the ClonalFrame genealogy tree, based on the distinct *C. upsaliensis* MLST allele sequences at each locus (ST-166 and ST-170 and ST-167, ST-171 and ST-172, Fig 3). One major clonal complex (ST-42 CC, Fig 3) formed a separate cluster including only human patient isolates (mainly gastroenteritis except the isolate RM3195 from a GBS patient). In addition, some small groups, representing isolates from both dogs (from this and previous studies) and human patients (previous studies) occurred as well as a bigger cluster representing nine STs from unknown/unpublished sources (Fig 3). Otherwise most of the STs showed only little phylogenetic relatedness and at least one third of the isolates seemed quite unrelated to each other, including eight (50%) of the *C. upsaliensis* STs of the present study.

The evolutionary descents of *C. upsaliensis* isolates were further inferred using the goeBURST algorithm implemented in PHYLOViZ and visualized as an extended full Minimum Spanning Tree (MST) (Fig 4), overlaid by data representing the sources of the isolates. Although the most single locus variants originated from the same source and country combination, some were also found among canine and human isolates originating either from the same or two different countries. Furthermore, similarly as the human and dog *C. upsaliensis* isolates from the UK and USA, the Finnish dog isolates were distributed throughout the phylogenetic tree. The only exception was the ST-42 CC cluster, wherein most of the isolates

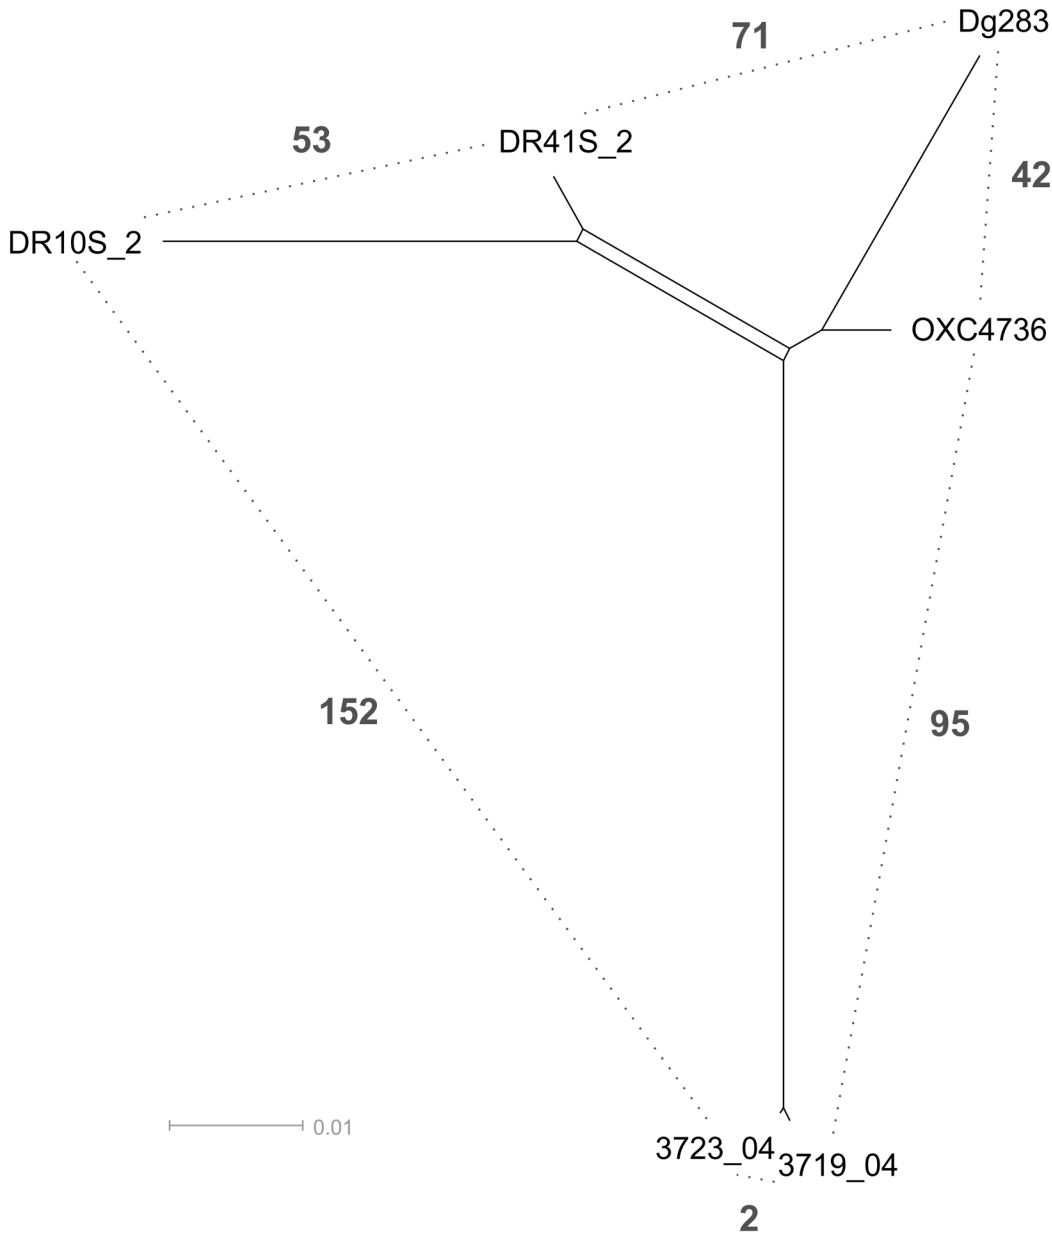

**Fig 1. wgMLST of *C. jejuni* ST-1326 isolates.** SplitsTree of the NeighborNet network (1,457 shared genes) of *C. jejuni* ST-1326 isolates using GeP (Zhang et al., 2015). Dashed lines and numbers indicate the number of allelic differences observed between the pair of isolates. Two UK isolates (OXC4736 and Dg283) obtained from PubMLST isolate database (PubMLST id 18439 and 25960) and two chicken isolates (3719\_04 and 3723\_04) from our own collection (Llarena et al. 2015) were included as reference strains.

doi:10.1371/journal.pone.0132660.g001

originated from South Africa and Belgium solely from humans and the cluster representing isolates from undefined sources (Fig 4), which was also identified in ClonalFrame analysis (Fig 3).

### Antimicrobial resistance of *Campylobacter* spp. isolates

The two *C. jejuni* isolates were susceptible to all the antimicrobials studied. Among *C. upsaliensis*, the most notable resistance trait was resistance to streptomycin with 79% (19/24) of the

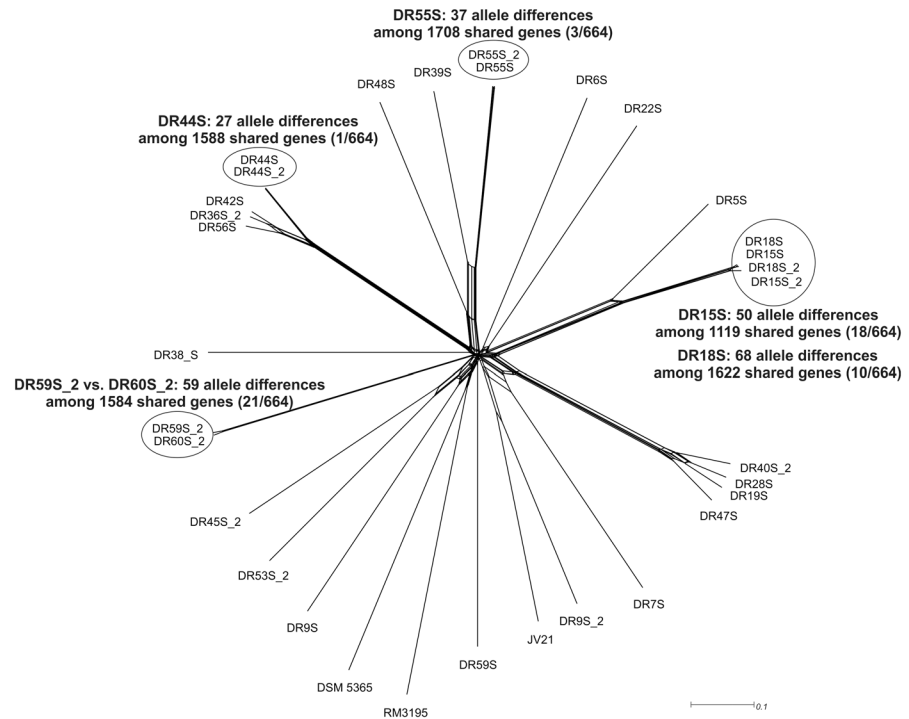

**Fig 2. wgMLST of *C. upsaliensis* isolates.** SplitsTree of the NeighborNet network (664 shared genes) of all available *C. upsaliensis* whole genomes, including three reference strains and isolates from dogs that were sampled only once and thus not included in this study, using GeP (Zhang et al., 2015). A new GeP analysis was performed for all closely related isolates and the results are shown next to the pair of isolates. The number of allelic differences, observed in the primary GeP analysis among the 664 shared genes, are shown in parenthesis. The reference genomes DSM 5365, JV21 and RM3195 were obtained from GenBank (accession numbers JHZN00000000, NZ\_AEPU00000000 and NZ\_AAFJ00000000).

doi:10.1371/journal.pone.0132660.g002

isolates having MICs of >4 mg/l and with seven of these with MICs of >512 mg/l. The remaining five isolates had streptomycin MICs of 0.5–2 mg/l (S3 Table). All isolates with streptomycin MIC > 4 mg/l encoded arginine (AGA) in codon 88 of *rpsL*, while all the five susceptible isolates encoded lysine (AAA) in the same position (S3 Table). Further, all isolates with streptomycin MIC > 512 mg/l had various deletion or insertion mutations in *rsmG* leading to frameshift and a premature stop codon immediately downstream of the mutation site resulting in termination at amino acid number 13, 49, 137, 144 or 155 of the encoded 7-methylguanosine methyltransferase. Also some intermediate-level resistant (MIC 16 mg/l) and susceptible isolates showed truncation of *rsmG* but only the last 3–5 amino acids were lost in these cases (S3 Table). No resistance associated mutations in the sequences of *rrs* were detected. One *C. upsaliensis* isolate was resistant to ciprofloxacin (MIC 1 mg/l) and nalidixic acid (MIC > 64 mg/l) and had point mutation C257T in *gyrA* resulting in amino acid substitution Thr-86-Met. No resistance to TET, ERY or GEN was detected.

In two cases *C. upsaliensis* isolates had closely related STs but differing MICs for streptomycin, and no clear pattern in the distribution of resistant or susceptible isolates was identified (Table 1). However, the *C. upsaliensis* isolates that originated from the same dog in the consecutive samplings and represented the same ST (DR15S and DR15S\_2; DR18S and DR18S\_2; DR44S and DR44S\_2; DR55S and DR55S\_2, Table 1) always had same streptomycin MICs.



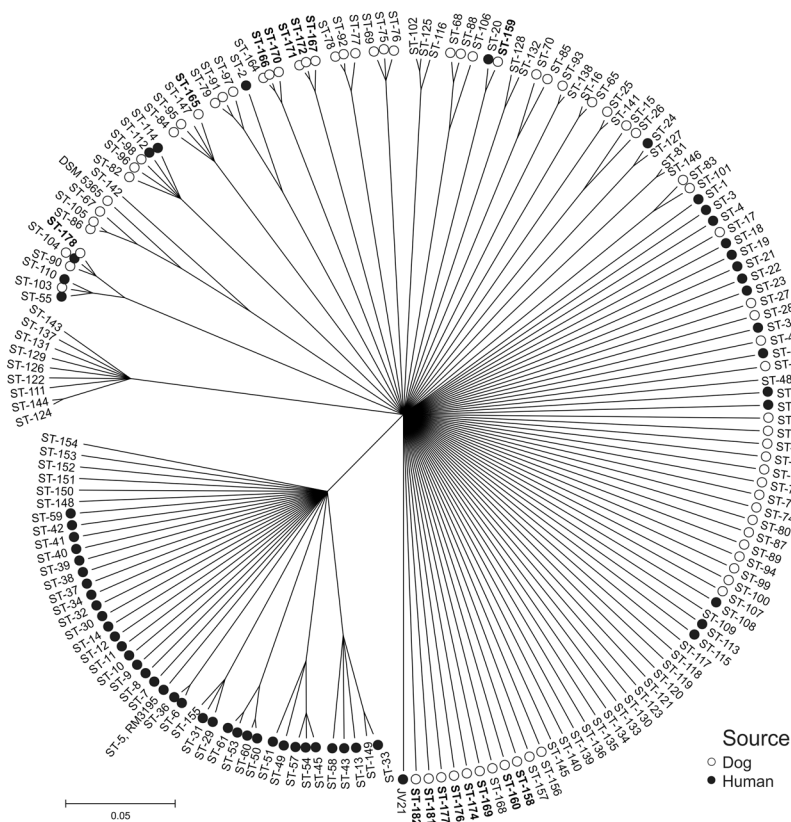

**Fig 3. ClonalFrame genealogy tree based on all known *C. upsaliensis* MLST allele sequences.** Novel STs reported in this study are indicated in bold. The sources of the isolates are indicated based on the information available in the PubMLST *Campylobacter non jejuni/coli* database and in Parsons et al. (2012).

doi:10.1371/journal.pone.0132660.g003

### Discussion

Dogs are common pets especially in industrialized countries and approximately 50,000 new dogs are registered annually in Finland ([www.kennelliitto.fi](http://www.kennelliitto.fi)). Dogs carrying *Campylobacter* spp. in their intestines may pose a risk of human infection by direct or indirect contact with fecal material of the animals [8]. In the present study, *C. upsaliensis* was the most common *Campylobacter* spp. found from dogs and *C. jejuni* was detected only in few cases, which is in accordance with several previous publications [3,44]. However, some studies [11,45] have found *C. jejuni* as the main species in canines, which could be due to the differences in the studied dog populations or isolation protocols.

Similarly to the results of Lenz et al. (2009) also we detected a low proportion of *C. jejuni* among the raw-fed group after the feeding period. Both *C. jejuni* isolates represented the same, rarely detected ST-1326 (ST-45 CC) that has previously been isolated from human patients, bovines, chickens, barnacle geese, grey seal pups and environmental water samples [46,47]. Furthermore, an association between ST-1326 and pet dog colonization was identified in a previous study from the Netherlands [8]. Since both *C. jejuni* isolates were detected from dogs living in different households, they likely originated from a common source, possibly from raw food. However, due to the low number of samples obtained, raw feed was not analysed in this study. Also, the option that these dogs acquired *C. jejuni* ST-1326 from other, possibly environmental-associated sources cannot be excluded since previous studies on wgMLST of *C. jejuni*

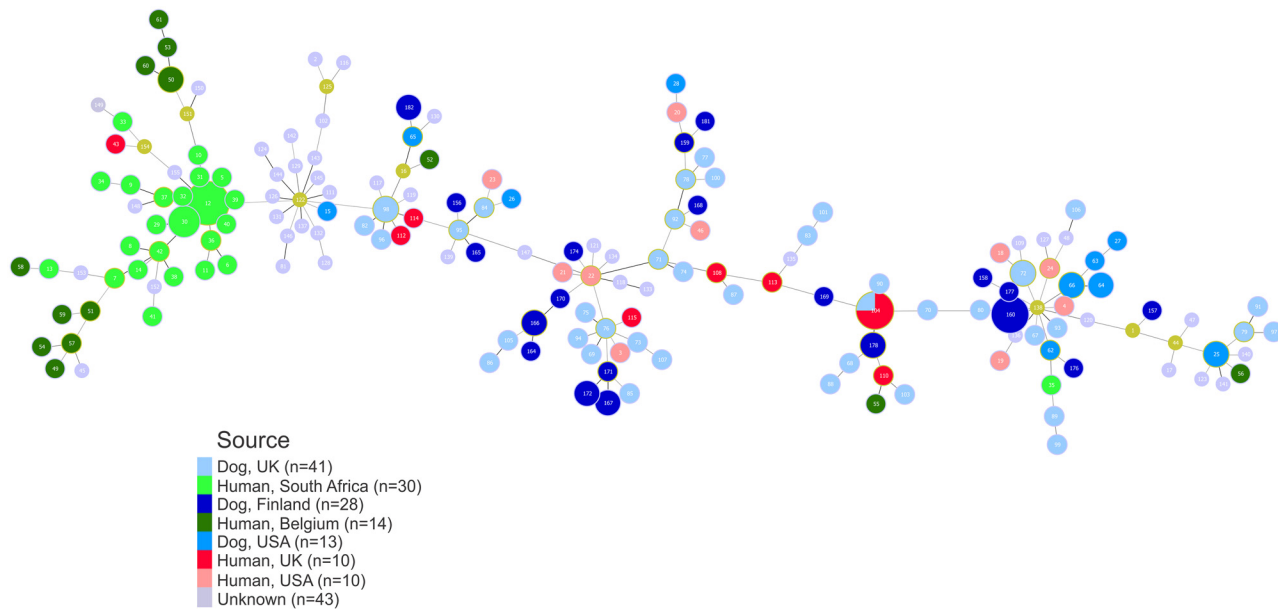

**Fig 4. goeBURST full Minimum Spanning Tree (MST) of *C. upsaliensis* ST allelic profiles.** Full MST of all *C. upsaliensis* allelic profiles present in PubMLST database overlaid by the isolation data (source and country combinations with more than 2 isolates were included), was generated using goeBURST and visualized with PHYLOViZ 1.1. The node sizes vary linearly with the number of isolates of a given ST. The links are color-coded for the number of differences i.e. darker links represent less allelic differences between the profiles than lighter links. Data used to create this figure is presented in [S1](#) and [S2](#) Tables.

doi:10.1371/journal.pone.0132660.g004

have revealed that only few genetic differences (single nucleotide polymorphisms, SNPs) may occur among temporally and genetically related isolates [48,49] and in this study a total of 53 allelic differences were observed between the two *C. jejuni* ST-1326 isolates obtained from two unrelated dogs.

Whole-genome MLST analysis between *C. upsaliensis* isolates obtained from individual dogs 4–5 months apart revealed also relatively high numbers of allelic differences (range 27–68) among the isolates representing the same STs. Unfortunately, no data of the effect of long-term host colonization on the genomic variation of *C. jejuni* or *C. upsaliensis* exist. Therefore, more research should be conducted to estimate the microevolution occurring in *Campylobacter* genomes during long-term colonization in different hosts.

The global genealogy of the MLST types of *C. upsaliensis* revealed a highly diverse population, in which *C. upsaliensis* isolates, detected from both dogs and human patients, were dispersed throughout the phylogenetic network. MLST types showed also some degree of overlap resulting in a hypothesis that in principle, all dog isolates could be capable of causing disease also in humans. More isolates from various sources are needed to better understand the genealogy of *C. upsaliensis* MLST types, as only two out of five countries had deposited MLST types from both humans and dogs and other sources were lacking altogether.

Macrolides and fluoroquinolones are the first and second choice antibiotics when antimicrobial treatment of human campylobacteriosis is warranted [50]. In Finland, there are no data available on the consumption of antimicrobial agents per animal species yet but there are several fluoroquinolone containing drugs registered for small animals. However, both *C. jejuni* isolates were susceptible and, apart from streptomycin, most *C. upsaliensis* isolates were also susceptible to all the antimicrobials studied. Quinolone resistance in a small percentage among *C. upsaliensis* from pets has been detected previously for example in Belgium, Italy and Norway [10,31,32]. Resistance mechanisms for quinolones in *C. jejuni* and *C. coli* are well described

and resistance is mediated by single point mutation in the *gyrA* gene and also by the increased activity of the CmeABC efflux pump [51]. The most commonly described resistance conferring mutation is C257T in *gyrA*, leading to amino acid substitution Thr-86-Ile in *C. jejuni* and *C. coli* and resulting in high level of quinolone resistance, while other substitutions (Thr-86-Lys, Asp-90-Asn, Asp-90-Ala, Ala-70-Thr, Thr-86-Ala) have been associated with low level of quinolone resistance or resistance to nalidixic acid alone [51–53]. We describe here the same point mutation C257T in *C. upsaliensis*, but interestingly, this point mutation leads to Thr-86-Met substitution in this species leading to lower level of ciprofloxacin resistance (1 mg/l). To our knowledge, this is the first description of Thr-86-Met mutation in GyrA in connection to quinolone resistance.

Our finding that 79% of the *C. upsaliensis* isolates had increased MICs for streptomycin is in accordance with previous studies [5,31]. Streptomycin resistance in *C. jejuni* and *C. coli* can be conferred by enzymatic modification enzymes encoded in plasmids or chromosomally [54,55] and we have also shown that mutations in the *rpsL* gene codons 43 and 88 lead to streptomycin resistance in *C. coli* [56]. This latter resistance mechanism is quite well characterized also in other organisms, such as *E. coli*, *M. tuberculosis* and *Helicobacter pylori* [57–59]. Our finding that all *C. upsaliensis* isolates with streptomycin MIC > 4 mg/l encode arginine in codon 88 (and lysine in 43) of the *rpsL* gene is consistent with some former studies: mutations in codon 43 have been associated with a higher level of STR resistance, while those in codon 88 have resulted in more variable STR MICs [56,58,60]. In addition, various (often frameshift) mutations within *rsmG* (previously known as *gidB*) encoding 7-methylguanosine methyltransferase that methylates 16S rRNA, have been associated with low level of streptomycin resistance in a number of bacterial species and high frequency of emergence of streptomycin-resistant mutants. Furthermore, *rsmG rpsL* double mutants have been associated with a high-level streptomycin resistant phenotype in several bacterial species, such as *M. tuberculosis*, *Bacillus subtilis* and *E. coli* [61–63] and this was also observed in all highly resistant *C. upsaliensis* isolates described in this study.

## Conclusions

*C. upsaliensis*, showing a weakly clonal population structure, was the most common finding among dogs before and after the feeding regimen. No statistically significant correlation was found between the feeding strategies and the prevalence of *Campylobacter* spp. carriage. However, *C. jejuni* isolates with the same ST were recovered from two raw-fed dogs, suggesting a common source of infection. The main antimicrobial resistance detected among *C. upsaliensis* was against streptomycin and apart from that, the isolates were highly susceptible. Further studies should be conducted to reveal the significance of *C. upsaliensis* in human infections and to identify its sources and reservoirs worldwide. Also the role of raw-feeding versus direct transmission of *Campylobacter* species between different animals should be further investigated.

## Supporting Information

**S1 Table.** *C. upsaliensis* STs and corresponding allele profiles used for Full MST (Fig 4). (XLSX)

**S2 Table.** Epidemiological data associated with *C. upsaliensis* isolates used for Full MST image generated by PHYLOViZ (Fig 4). (XLSX)

**S3 Table. Streptomycin MICs and *rpsL* and *rsmG* mutations in spontaneous streptomycin resistant *C. upsaliensis* isolates.**

(XLSX)

**Acknowledgments**

Mirko Rossi is acknowledged for excellent technical assistance in genome assembly.

**Author Contributions**

Conceived and designed the experiments: RK AHB. Performed the experiments: SO SK JR.

Analyzed the data: SO SK RK. Contributed reagents/materials/analysis tools: MLH AHB.

Wrote the paper: SO SK RK MLH.

**References**

1. Parsons BN, Porter CJ, Ryvar R, Stavisky J, Williams NJ, Pinchbeck GL, et al. Prevalence of *Campylobacter* spp. in a cross-sectional study of dogs attending veterinary practices in the UK and risk indicators associated with shedding. *Vet J*. 2010; 184: 66–70. doi: [10.1016/j.tvjl.2009.01.009](https://doi.org/10.1016/j.tvjl.2009.01.009) PMID: [19223212](https://pubmed.ncbi.nlm.nih.gov/19223212/)
2. Hald B, Pedersen K, Waino M, Jorgensen JC, Madsen M. Longitudinal study of the excretion patterns of thermophilic *Campylobacter* spp. in young pet dogs in Denmark. *J Clin Microbiol*. 2004; 42: 2003–2012. PMID: [15131162](https://pubmed.ncbi.nlm.nih.gov/15131162/)
3. Engvall EO, Brandstrom B, Andersson L, Baverud V, Trowald-Wigh G, Englund L. Isolation and identification of thermophilic *Campylobacter* species in faecal samples from Swedish dogs. *Scand J Infect Dis*. 2003; 35: 713–718. PMID: [14606609](https://pubmed.ncbi.nlm.nih.gov/14606609/)
4. Couturier BA, Hale DC, Couturier MR. Association of *Campylobacter upsaliensis* with persistent bloody diarrhea. *J Clin Microbiol*. 2012; 50: 3792–3794. doi: [10.1128/JCM.01807-12](https://doi.org/10.1128/JCM.01807-12) PMID: [22915607](https://pubmed.ncbi.nlm.nih.gov/22915607/)
5. Goossens H, Giesendorf BA, Vandamme P, Vlaes L, Van den Borre C, Koeken A, et al. Investigation of an outbreak of *Campylobacter upsaliensis* in day care centers in Brussels: analysis of relationships among isolates by phenotypic and genotypic typing methods. *J Infect Dis*. 1995; 172: 1298–1305. PMID: [7594667](https://pubmed.ncbi.nlm.nih.gov/7594667/)
6. Shimizu Y, Ishii A, Takahata A, Kajiyama T, Yamahatsu A, Ito H, et al. *Campylobacter* bacteremia in hemodialysis patients by eating raw meat—the importance of sanitary education. *Case Rep Nephrol Urol*. 2012; 2: 145–151. doi: [10.1159/000343499](https://doi.org/10.1159/000343499) PMID: [23197970](https://pubmed.ncbi.nlm.nih.gov/23197970/)
7. Kapperud G, Skjerve E, Bean NH, Ostroff SM, Lassen J. Risk factors for sporadic *Campylobacter* infections: results of a case-control study in southeastern Norway. *J Clin Microbiol*. 1992; 30: 3117–3121. PMID: [1452694](https://pubmed.ncbi.nlm.nih.gov/1452694/)
8. Mughini Gras L, Smid JH, Wagenaar JA, Koene MG, Havelaar AH, Friesema IH, et al. Increased risk for *Campylobacter jejuni* and *C. coli* infection of pet origin in dog owners and evidence for genetic association between strains causing infection in humans and their pets. *Epidemiol Infect*. 2013; 141: 2526–2535. doi: [10.1017/S0950268813000356](https://doi.org/10.1017/S0950268813000356) PMID: [23445833](https://pubmed.ncbi.nlm.nih.gov/23445833/)
9. Carbonero A, Torralbo A, Borge C, Garcia-Bocanegra I, Arenas A, Perea A. *Campylobacter* spp., *C. jejuni* and *C. upsaliensis* infection-associated factors in healthy and ill dogs from clinics in Cordoba, Spain. Screening tests for antimicrobial susceptibility. *Comp Immunol Microbiol Infect Dis*. 2012; 35: 505–512. doi: [10.1016/j.cimid.2012.05.002](https://doi.org/10.1016/j.cimid.2012.05.002) PMID: [22640550](https://pubmed.ncbi.nlm.nih.gov/22640550/)
10. Rossi M, Hänninen ML, Revez J, Hannula M, Zanoni RG. Occurrence and species level diagnostics of *Campylobacter* spp., enteric *Helicobacter* spp. and *Anaerobiospirillum* spp. in healthy and diarrheic dogs and cats. *Vet Microbiol*. 2008; 129: 304–314. doi: [10.1016/j.vetmic.2007.11.014](https://doi.org/10.1016/j.vetmic.2007.11.014) PMID: [18164874](https://pubmed.ncbi.nlm.nih.gov/18164874/)
11. Amar C, Kittl S, Spreng D, Thomann A, Korczak BM, Burnens AP, et al. Genotypes and antibiotic resistance of canine *Campylobacter jejuni* isolates. *Vet Microbiol*. 2014; 168: 124–130. doi: [10.1016/j.vetmic.2013.10.006](https://doi.org/10.1016/j.vetmic.2013.10.006) PMID: [24210812](https://pubmed.ncbi.nlm.nih.gov/24210812/)
12. Chaban B, Ngeleka M, Hill JE. Detection and quantification of 14 *Campylobacter* species in pet dogs reveals an increase in species richness in feces of diarrheic animals. *BMC Microbiol*. 2010; 10: 73-2180-10–73.
13. Workman SN, Mathison GE, Lavoie MC. Pet dogs and chicken meat as reservoirs of *Campylobacter* spp. in Barbados. *J Clin Microbiol*. 2005; 43: 2642–2650. PMID: [15956378](https://pubmed.ncbi.nlm.nih.gov/15956378/)

14. Kittl S, Heckel G, Korczak BM, Kuhnert P. Source attribution of human *Campylobacter* isolates by MLST and *fla*-typing and association of genotypes with quinolone resistance. PLoS One. 2013; 8: e81796. doi: [10.1371/journal.pone.0081796](https://doi.org/10.1371/journal.pone.0081796) PMID: [24244747](https://pubmed.ncbi.nlm.nih.gov/24244747/)
15. Miller WG, On SL, Wang G, Fontanoz S, Lastovica AJ, Mandrell RE. Extended multilocus sequence typing system for *Campylobacter coli*, *C. lari*, *C. upsaliensis*, and *C. helveticus*. J Clin Microbiol. 2005; 43: 2315–2329. PMID: [15872261](https://pubmed.ncbi.nlm.nih.gov/15872261/)
16. Dingle KE, Colles FM, Wareing DR, Ure R, Fox AJ, Bolton FE, et al. Multilocus sequence typing system for *Campylobacter jejuni*. J Clin Microbiol. 2001; 39: 14–23. PMID: [11136741](https://pubmed.ncbi.nlm.nih.gov/11136741/)
17. Parsons BN, Cody AJ, Porter CJ, Stavisky JH, Smith JL, Williams NJ, et al. Typing of *Campylobacter jejuni* isolates from dogs by use of multilocus sequence typing and pulsed-field gel electrophoresis. J Clin Microbiol. 2009; 47: 3466–3471. doi: [10.1128/JCM.01046-09](https://doi.org/10.1128/JCM.01046-09) PMID: [19794053](https://pubmed.ncbi.nlm.nih.gov/19794053/)
18. Parsons BN, Porter CJ, Stavisky JH, Williams NJ, Birtles RJ, Miller WG, et al. Multilocus sequence typing of human and canine *C. upsaliensis* isolates. Vet Microbiol. 2012; 157: 391–397. doi: [10.1016/j.vetmic.2011.12.035](https://doi.org/10.1016/j.vetmic.2011.12.035) PMID: [22266159](https://pubmed.ncbi.nlm.nih.gov/22266159/)
19. Billinghamhurst I. The BARF Diet: Raw Feeding for Dogs and Cats Using Evolutionary Principles. 1st ed. N.S.W: Australia: N.S.W. Australia: Ian Billinghamhurst.; 2001.
20. Katzav M, Isohanni P, Lund M, Hakkinen M, Lyhs U. PCR assay for the detection of *Campylobacter* in marinated and non-marinated poultry products. Food Microbiol. 2008; 25: 908–914. doi: [10.1016/j.fm.2008.05.010](https://doi.org/10.1016/j.fm.2008.05.010) PMID: [18721681](https://pubmed.ncbi.nlm.nih.gov/18721681/)
21. Edwards DS, Milne LM, Morrow K, Sheridan P, Verlander NQ, Mulla R, et al. Campylobacteriosis outbreak associated with consumption of undercooked chicken liver pate in the East of England, September 2011: identification of a dose-response risk. Epidemiol Infect. 2014; 142: 352–357. doi: [10.1017/S0950268813001222](https://doi.org/10.1017/S0950268813001222) PMID: [23711104](https://pubmed.ncbi.nlm.nih.gov/23711104/)
22. Noormohamed A, Fakhr MK. A higher prevalence rate of *Campylobacter* in retail beef livers compared to other beef and pork meat cuts. Int J Environ Res Public Health. 2013; 10: 2058–2068. doi: [10.3390/ijerph10052058](https://doi.org/10.3390/ijerph10052058) PMID: [23698698](https://pubmed.ncbi.nlm.nih.gov/23698698/)
23. Sasaki Y, Haruna M, Murakami M, Hayashida M, Ito K, Noda M, et al. Prevalence of *Campylobacter* spp., *Salmonella* spp., *Listeria monocytogenes*, and hepatitis E virus in swine livers collected at an abattoir. Jpn J Infect Dis. 2013; 66: 161–164. PMID: [23514917](https://pubmed.ncbi.nlm.nih.gov/23514917/)
24. Trokhymchuk A, Waldner C, Chaban B, Gow S, Hill JE. Prevalence and diversity of *Campylobacter* species in Saskatchewan retail ground beef. J Food Prot. 2014; 77: 2106–2110. doi: [10.4315/0362-028X.JFP-14-247](https://doi.org/10.4315/0362-028X.JFP-14-247) PMID: [25474057](https://pubmed.ncbi.nlm.nih.gov/25474057/)
25. Weese JS, Rousseau J, Arroyo L. Bacteriological evaluation of commercial canine and feline raw diets. Can Vet J. 2005; 46: 513–516. PMID: [16048011](https://pubmed.ncbi.nlm.nih.gov/16048011/)
26. Strohmeyer RA, Morley PS, Hyatt DR, Dargatz DA, Scorza AV, Lappin MR. Evaluation of bacterial and protozoal contamination of commercially available raw meat diets for dogs. J Am Vet Med Assoc. 2006; 228: 537–542. PMID: [16478425](https://pubmed.ncbi.nlm.nih.gov/16478425/)
27. Lenz J, Joffe D, Kauffman M, Zhang Y, LeJeune J. Perceptions, practices, and consequences associated with foodborne pathogens and the feeding of raw meat to dogs. Can Vet J. 2009; 50: 637–643. PMID: [19721784](https://pubmed.ncbi.nlm.nih.gov/19721784/)
28. Blaser MJ, Engberg J. Clinical aspects of *Campylobacter jejuni* and *Campylobacter coli* infections. In: Nachamkin I, Szymanski CM, Blaser MJ, editors. *Campylobacter*. Washington DC, USA: ASM Press; 2008. pp. 99–121.
29. Aarestrup FM, Engberg J. Antimicrobial resistance of thermophilic *Campylobacter*. Vet Res. 2001; 32: 311–321. PMID: [11432422](https://pubmed.ncbi.nlm.nih.gov/11432422/)
30. Acke E, McGill K, Quinn T, Jones BR, Fanning S, Whyte P. Antimicrobial resistance profiles and mechanisms of resistance in *Campylobacter jejuni* isolates from pets. Foodborne Pathog Dis. 2009; 6: 705–710. doi: [10.1089/tpd.2008.0225](https://doi.org/10.1089/tpd.2008.0225) PMID: [19580444](https://pubmed.ncbi.nlm.nih.gov/19580444/)
31. Sandberg M, Bergsjö B, Hofshagen M, Skjerve E, Kruse H. Risk factors for *Campylobacter* infection in Norwegian cats and dogs. Prev Vet Med. 2002; 55: 241–253. PMID: [12392875](https://pubmed.ncbi.nlm.nih.gov/12392875/)
32. Vandenberg O, Houf K, Douat N, Vlaes L, Retore P, Butzler JP, et al. Antimicrobial susceptibility of clinical isolates of non-*jejuni/coli* campylobacters and arcobacters from Belgium. J Antimicrob Chemother. 2006; 57: 908–913. PMID: [16533825](https://pubmed.ncbi.nlm.nih.gov/16533825/)
33. Fouts DE, Mongodin EF, Mandrell RE, Miller WG, Rasko DA, Ravel J, et al. Major structural differences and novel potential virulence mechanisms from the genomes of multiple *Campylobacter* species. PLoS Biol. 2005; 3: e15. PMID: [15660156](https://pubmed.ncbi.nlm.nih.gov/15660156/)
34. Denis M, Soumet C, Rivoal K, Ermel G, Blivet D, Salvat G, et al. Development of a m-PCR assay for simultaneous identification of *Campylobacter jejuni* and *C. coli*. Lett Appl Microbiol. 1999; 29: 406–410. PMID: [10664985](https://pubmed.ncbi.nlm.nih.gov/10664985/)

35. Lawson AJ, Linton D, Stanley J, Owen RJ. Polymerase chain reaction detection and speciation of *Campylobacter upsaliensis* and *C. helveticus* in human faeces and comparison with culture techniques. *J Appl Microbiol.* 1997; 83: 375–380. PMID: [9351218](#)
36. Bankevich A, Nurk S, Antipov D, Gurevich AA, Dvorkin M, Kulikov AS, et al. SPAdes: a new genome assembly algorithm and its applications to single-cell sequencing. *J Comput Biol.* 2012; 19: 455–477. doi: [10.1089/cmb.2012.0021](#) PMID: [22506599](#)
37. Zhang J, Halkilahti J, Hanninen M, Rossi M. Refinement of whole-genome multilocus sequence typing analysis by addressing gene paralogy. *J Clin Microbiol.* 2015 May; 53(5):1765–7. doi: [10.1128/JCM.00051-15](#) PMID: [25788543](#)
38. Huson DH, Bryant D. Application of phylogenetic networks in evolutionary studies. *Mol Biol Evol.* 2006; 23: 254–267. PMID: [16221896](#)
39. Didelot X, Falush D. Inference of bacterial microevolution using multilocus sequence data. *Genetics.* 2007; 175: 1251–1266. PMID: [17151252](#)
40. Feil EJ, Li BC, Aanensen DM, Hanage WP, Spratt BG. eBURST: inferring patterns of evolutionary descent among clusters of related bacterial genotypes from multilocus sequence typing data. *J Bacteriol.* 2004; 186: 1518–1530. PMID: [14973027](#)
41. Francisco AP, Bugalho M, Ramirez M, Carrico JA. Global optimal eBURST analysis of multilocus typing data using a graphic matroid approach. *BMC Bioinformatics.* 2009; 10: 152–2105–10–152.
42. Francisco AP, Vaz C, Monteiro PT, Melo-Cristino J, Ramirez M, Carrico JA. PHYLOViZ: phylogenetic inference and data visualization for sequence based typing methods. *BMC Bioinformatics.* 2012; 13: 87–2105–13–87.
43. Zaroni RG, Rossi M, Giacomucci D, Sanguinetti V, Manfreda G. Occurrence and antibiotic susceptibility of *Helicobacter pullorum* from broiler chickens and commercial laying hens in Italy. *Int J Food Microbiol.* 2007; 116: 168–173. PMID: [17303278](#)
44. Procter TD, Pearl DL, Finley RL, Leonard EK, Janecko N, Reid-Smith RJ, et al. A cross-sectional study examining *Campylobacter* and other zoonotic enteric pathogens in dogs that frequent dog parks in three cities in south-western Ontario and risk factors for shedding of *Campylobacter* spp. *Zoonoses Public Health.* 2014; 61: 208–218. doi: [10.1111/zph.12062](#) PMID: [23802765](#)
45. Tsai HJ, Huang HC, Lin CM, Lien YY, Chou CH. *Salmonellae* and *Campylobacters* in household and stray dogs in northern Taiwan. *Vet Res Commun.* 2007; 31: 931–939. PMID: [17285243](#)
46. Llarena AK, Huneau A, Hakkinen M, Hanninen ML. Predominant *Campylobacter jejuni* Sequence Types Persist in Finnish Chicken Production. *PLoS One.* 2015; 10: e0116585. doi: [10.1371/journal.pone.0116585](#) PMID: [25700264](#)
47. Baily JL, Meric G, Bayliss S, Foster G, Moss SE, Watson E, et al. Evidence of land-sea transfer of the zoonotic pathogen *Campylobacter* to a wildlife marine sentinel species. *Mol Ecol.* 2015; 24: 208–221. doi: [10.1111/mec.13001](#) PMID: [25401947](#)
48. Revez J, Llarena AK, Schott T, Kuusi M, Hakkinen M, Kivisto R, et al. Genome analysis of *Campylobacter jejuni* strains isolated from a waterborne outbreak. *BMC Genomics.* 2014; 15: 768–2164–15–768.
49. Kivistö RI, Kovanen S, Skarp-de Haan A, Schott T, Rahkio M, Rossi M, et al. Evolution and comparative genomics of *Campylobacter jejuni* ST-677 clonal complex. *Genome Biol Evol.* 2014; 6: 2424–2438. doi: [10.1093/gbe/evu194](#) PMID: [25193305](#)
50. EFSA (European Food Safety Authority) and ECDC (European Centre for Disease Prevention and Control). EU summary report on antimicrobial resistance in zoonotic and indicator bacteria from humans, animals and food in 2013. *EFSA J.* 2015; 4036: 178.
51. Luo N, Sahin O, Lin J, Michel LO, Zhang Q. In vivo selection of *Campylobacter* isolates with high levels of fluoroquinolone resistance associated with *gyrA* mutations and the function of the CmeABC efflux pump. *Antimicrob Agents Chemother.* 2003; 47: 390–394. PMID: [12499221](#)
52. Wang Y, Huang WM, Taylor DE. Cloning and nucleotide sequence of the *Campylobacter jejuni gyrA* gene and characterization of quinolone resistance mutations. *Antimicrob Agents Chemother.* 1993; 37: 457–463. PMID: [8384814](#)
53. Jesse TW, Englen MD, Pittenger-Alley LG, Fedorka-Cray PJ. Two distinct mutations in *gyrA* lead to ciprofloxacin and nalidixic acid resistance in *Campylobacter coli* and *Campylobacter jejuni* isolated from chickens and beef cattle. *J Appl Microbiol.* 2006; 100: 682–688. PMID: [16553723](#)
54. Nirdnoy W, Mason CJ, Guerry P. Mosaic structure of a multiple-drug-resistant, conjugative plasmid from *Campylobacter jejuni*. *Antimicrob Agents Chemother.* 2005; 49: 2454–2459. PMID: [15917546](#)
55. Qin S, Wang Y, Zhang Q, Chen X, Shen Z, Deng F, et al. Identification of a novel genomic island conferring resistance to multiple aminoglycoside antibiotics in *Campylobacter coli*. *Antimicrob Agents Chemother.* 2012; 56: 5332–5339. doi: [10.1128/AAC.00809-12](#) PMID: [22869568](#)

56. Olkkola S, Juntunen P, Heiska H, Hyytiainen H, Hanninen ML. Mutations in the *rpsL* gene are involved in streptomycin resistance in *Campylobacter coli*. *Microb Drug Resist*. 2010; 16: 105–110. doi: [10.1089/mdr.2009.0128](https://doi.org/10.1089/mdr.2009.0128) PMID: [20370506](https://pubmed.ncbi.nlm.nih.gov/20370506/)
57. Funatsu G, Wittmann HG. Ribosomal proteins XXXIII. Location of amino-acid replacements in protein S12 isolated from *Escherichia coli* mutants resistant to streptomycin. *J Mol Biol*. 1972; 68: 547–550. PMID: [4560854](https://pubmed.ncbi.nlm.nih.gov/4560854/)
58. Meier A, Sander P, Schaper KJ, Scholz M, Bottger EC. Correlation of molecular resistance mechanisms and phenotypic resistance levels in streptomycin-resistant *Mycobacterium tuberculosis*. *Antimicrob Agents Chemother*. 1996; 40: 2452–2454. PMID: [8913445](https://pubmed.ncbi.nlm.nih.gov/8913445/)
59. Torii N, Nozaki T, Masutani M, Nakagama H, Sugiyama T, Saito D, et al. Spontaneous mutations in the *Helicobacter pylori rpsL* gene. *Mutat Res*. 2003; 535: 141–145. PMID: [12581531](https://pubmed.ncbi.nlm.nih.gov/12581531/)
60. Fukuda M, Koga H, Ohno H, Yang B, Hirakata Y, Maesaki S, et al. Relationship between genetic alteration of the *rpsL* gene and streptomycin susceptibility of *Mycobacterium tuberculosis* in Japan. *J Antimicrob Chemother*. 1999; 43: 281–284. PMID: [11252336](https://pubmed.ncbi.nlm.nih.gov/11252336/)
61. Nishimura K, Johansen SK, Inaoka T, Hosaka T, Tokuyama S, Tahara Y, et al. Identification of the RsmG methyltransferase target as 16S rRNA nucleotide G527 and characterization of *Bacillus subtilis rsmG* mutants. *J Bacteriol*. 2007; 189: 6068–6073. PMID: [17573471](https://pubmed.ncbi.nlm.nih.gov/17573471/)
62. Okamoto S, Tamaru A, Nakajima C, Nishimura K, Tanaka Y, Tokuyama S, et al. Loss of a conserved 7-methylguanosine modification in 16S rRNA confers low-level streptomycin resistance in bacteria. *Mol Microbiol*. 2007; 63: 1096–1106. PMID: [17238915](https://pubmed.ncbi.nlm.nih.gov/17238915/)
63. Benitez-Paez A, Cardenas-Brito S, Corredor M, Villarroya M, Armengod ME. Impairing methylations at ribosome RNA, a point mutation-dependent strategy for aminoglycoside resistance: the *rsmG* case. *Biomedica*. 2014; 34 Suppl 1: 41–49. doi: [10.1590/S0120-41572014000500006](https://doi.org/10.1590/S0120-41572014000500006) PMID: [24968035](https://pubmed.ncbi.nlm.nih.gov/24968035/)
